# Supplementary material for: Metal–organic framework-derived porous ternary ZnCo2O4 nanoplate arrays grown on carbon cloth for simultaneous electrochemical determination of ascorbic acid, dopamine, and uric acid
Source: Royal Society of Chemistry journal article supplement (doi:10.1039/d2ay01058e), 2022-01-01
Supplement: d2ay01058e1.pdf [file d2ay01058e1.pdf]

# Metal-organic Framework Derived Porous Ternary $\text{ZnCo}_2\text{O}_4$ Nanoplate Arrays Grown on Carbon Cloth for Simultaneous Electrochemical Determination of Ascorbic Acid, Dopamine and Uric Acid

Zhikun Hu<sup>a</sup>, Peng Zhao<sup>a</sup>, Jiawei Li<sup>a,b</sup>, Yuanyuan Chen<sup>a</sup>, Huisi Yang<sup>a</sup>, Jiaying Zhao<sup>a</sup>, Jiangbo Dong<sup>a</sup>, Na Qi<sup>a</sup>, Mei Yang<sup>a,\*</sup>, Danqun Huo<sup>a,\*</sup>, Changjun Hou<sup>a,c,\*</sup>

<sup>a</sup> Key Laboratory for Biorheological Science and Technology (Chongqing University), Ministry of Education, College of Bioengineering, Chongqing University, Chongqing, 400044, PR China.

<sup>b</sup> Chongqing University Three Gorges Hospital, Chongqing, 404000, PR China

<sup>c</sup> Chongqing Key Laboratory of Bio-perception & Intelligent Information Processing, School of Microelectronics and Communication Engineering, Chongqing University, Chongqing, 400044, PR China.

\* Corresponding authors: [yangmei@cqu.edu.cn](mailto:yangmei@cqu.edu.cn); [houcj@cqu.edu.cn](mailto:houcj@cqu.edu.cn); [huodq@cqu.edu.cn](mailto:huodq@cqu.edu.cn)

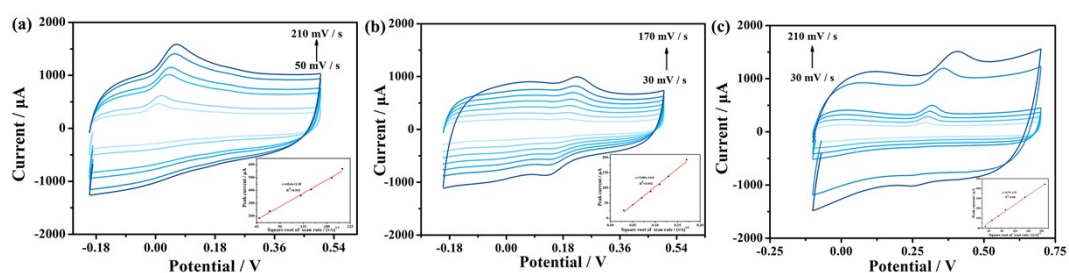

Fig. S1. CV curves of (a) 2 mM AA, (b) 80  $\mu\text{M}$  DA and (c) 120  $\mu\text{M}$  UA in PBS at  $\text{ZnCo}_2\text{O}_4$  NA/CC with different scan rate. Inset are the corresponding plots of peak current versus scan rate.

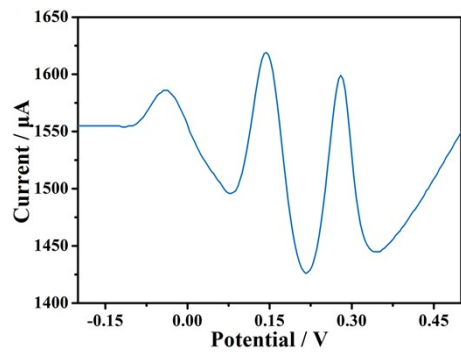

Fig. S2. DPV response in real serum sample.
